# Supplementary material for: Ultrarobust subzero healable materials enabled by polyphenol nano-assemblies
Source: Springer Nature journal article supplement (doi:10.1038/s41467-023-36461-9), 2023-02-13
Supplement: MOESM1 [file 41467_2023_36461_MOESM1_ESM.pdf]

## **Supplementary Information**

### **Ultrarobust subzero healable materials enabled by polyphenol nano-assemblies**

Nan Wang<sup>1</sup>, Xin Yang<sup>1</sup> & Xinxing Zhang<sup>1\*</sup>

<sup>1</sup> State Key Laboratory of Polymer Materials Engineering, Polymer Research Institute, Sichuan University, Chengdu 610065, China

Correspondence and requests for materials should be addressed to X.Z. (email: [xxzwwh@scu.edu.cn](mailto:xxzwwh@scu.edu.cn))

### Supplementary Figures:

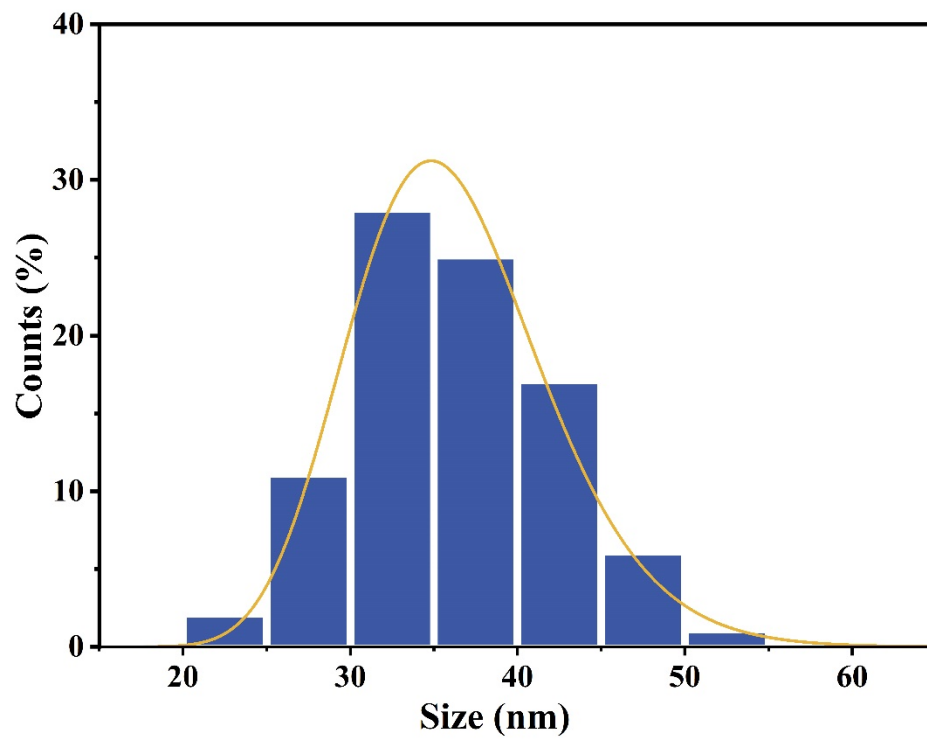

**Supplementary Figure 1.** Particle size distribution of EAN nanospheres.

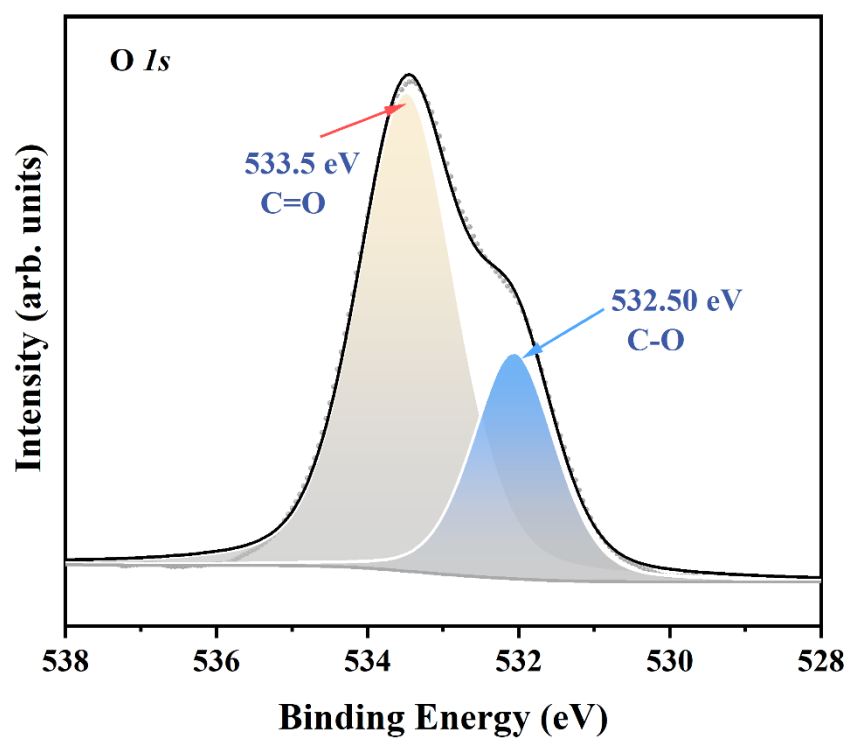

**Supplementary Figure 2.** The O 1s segment in the XPS spectra of EAN.

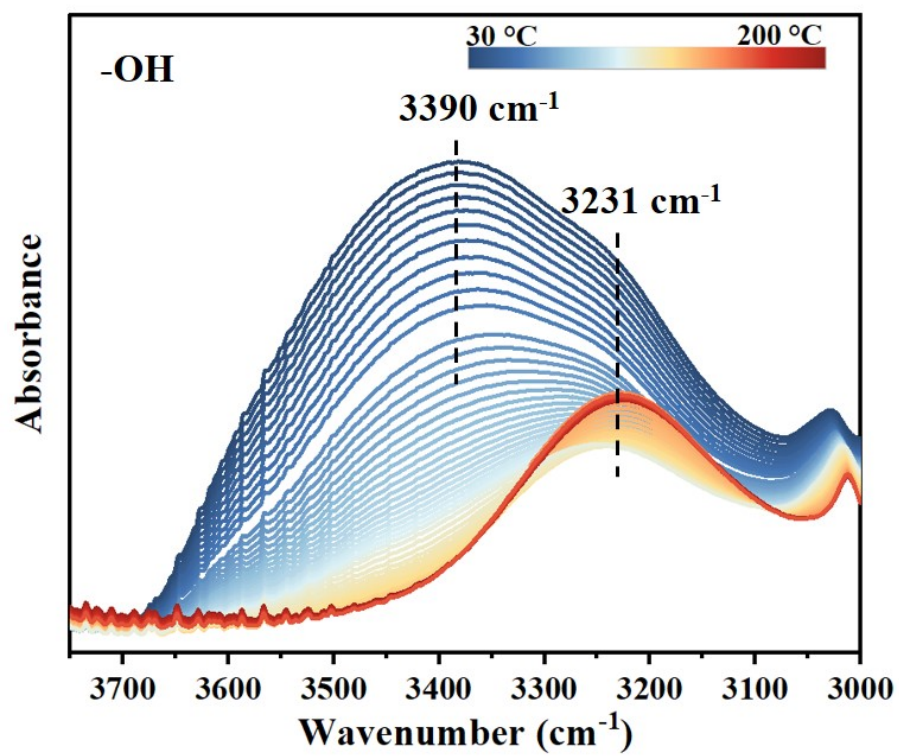

Supplementary Figure 3. FT-IR spectra of EAN.

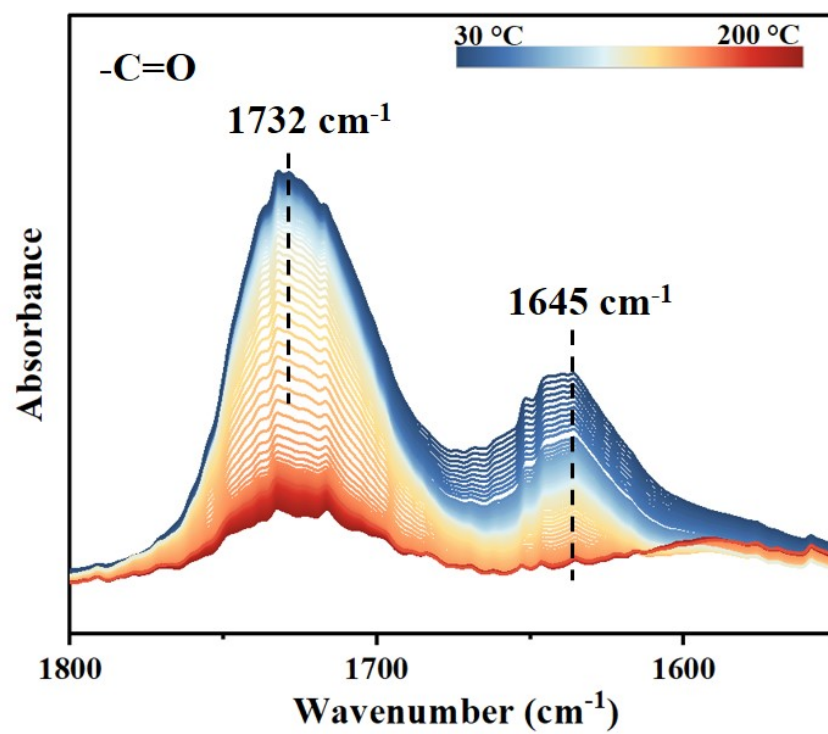

Supplementary Figure 4. FT-IR spectra of EAN.

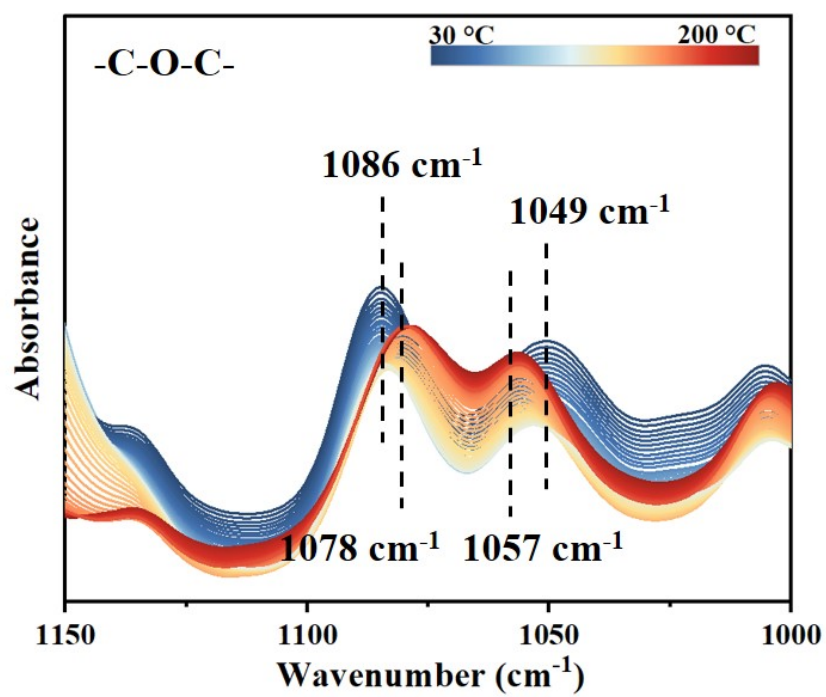

**Supplementary Figure 5.** FT-IR spectra of EAN.

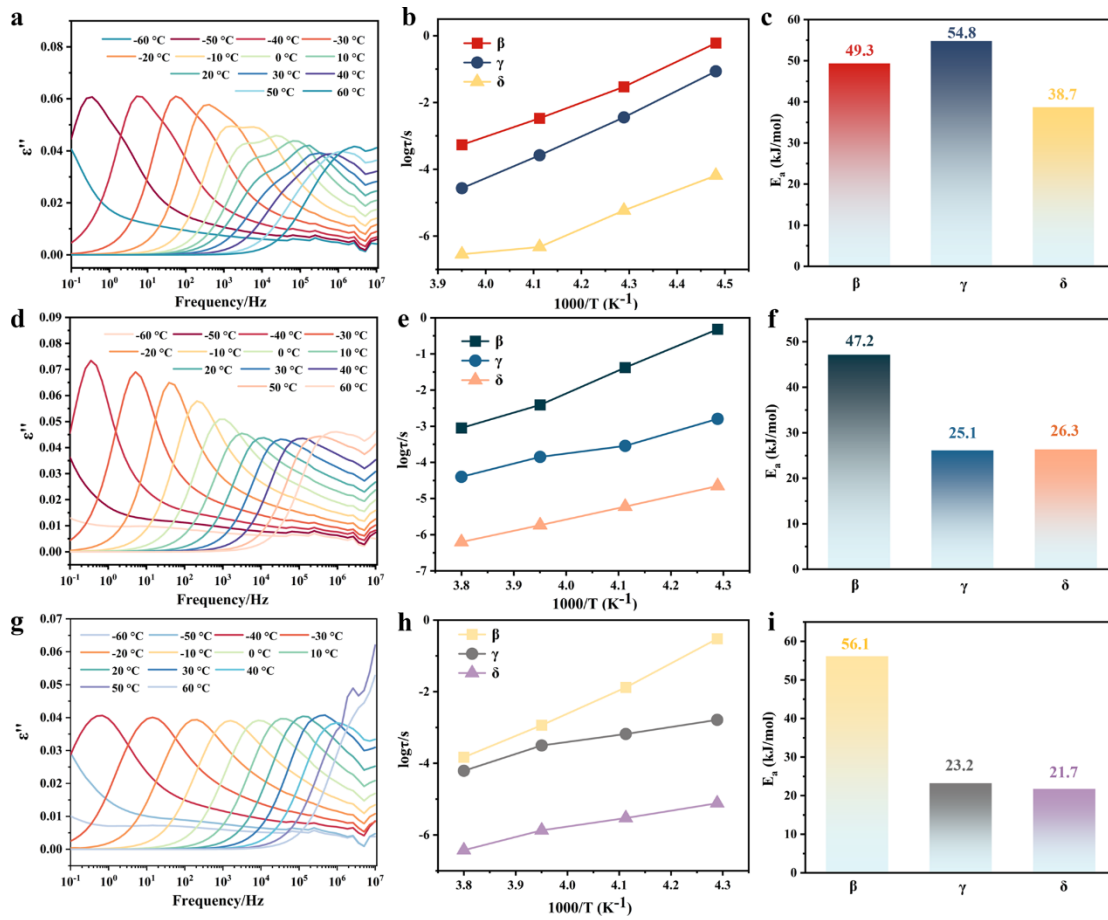

**Supplementary Figure 6.** Dielectric loss ( $\epsilon''$ ) as a function of frequency for PDES-PEGDA (**a**), PDES-EAN-a (**d**), PDES-EAN-c (**g**) ranged from -60 to 60 °C; The relaxation time as a function of temperature of different moieties for PDES-PEGDA (**b**), PDES-EAN-a (**e**), PDES-EAN-c (**h**); Active energies ( $E_a$ ) of PDES-PEGDA (**c**), PDES-EAN-a (**f**), PDES-EAN-c (**i**) for  $\beta$ -,  $\gamma$ -, and  $\delta$ -relaxation.

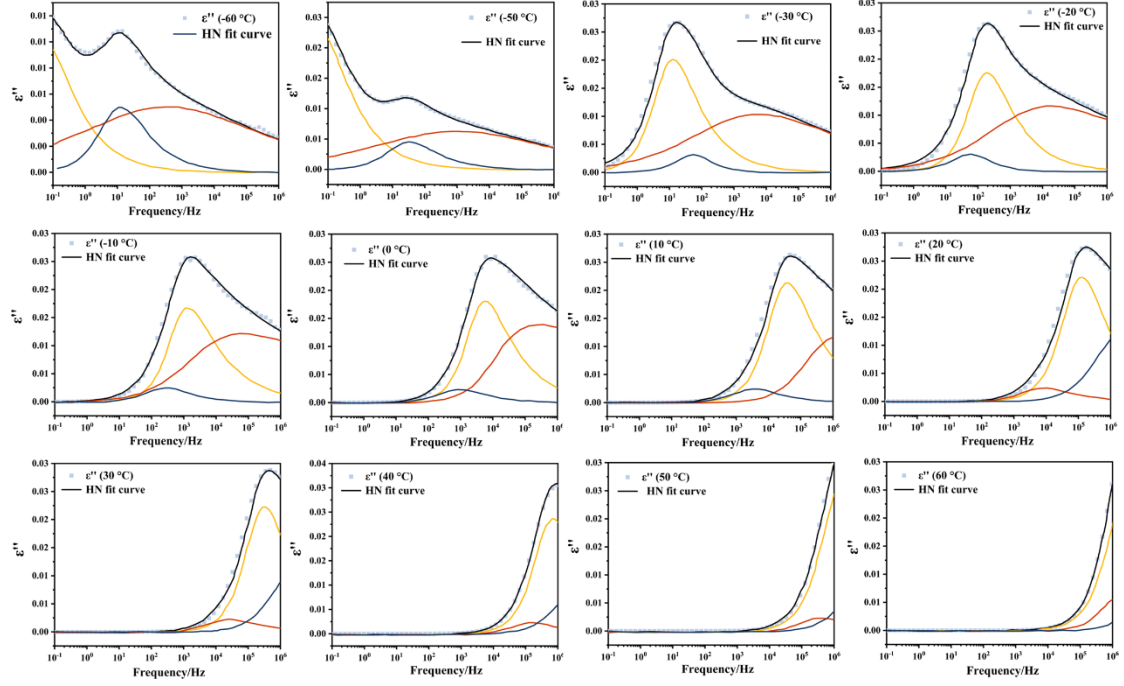

**Supplementary Figure 7.** Dielectric loss spectra of PDES-EAN-b fitted by a combination of three H-N equations from -60 to 60 °C.



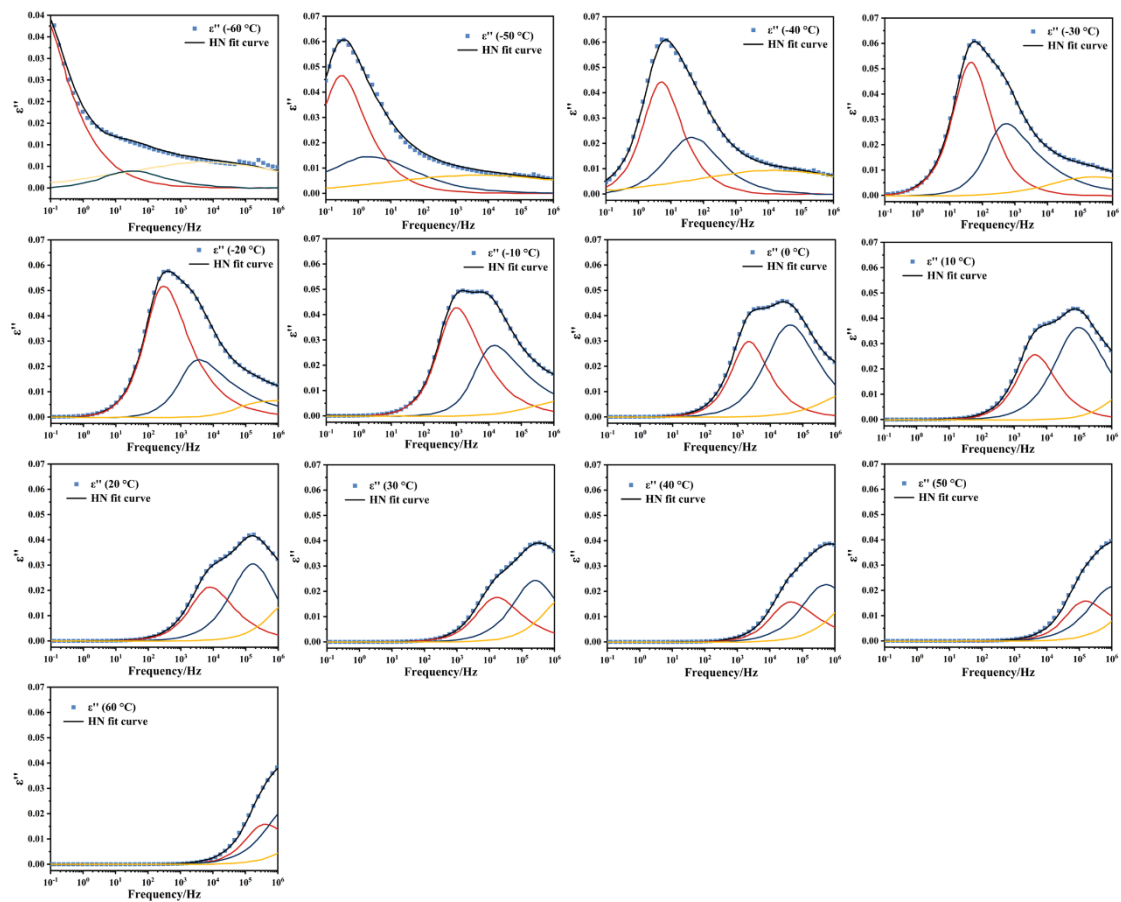

**Supplementary Figure 8.** Dielectric loss spectra of PDES-PEGDA fitted by a combination of three H-N equations from -60 to 60 °C.

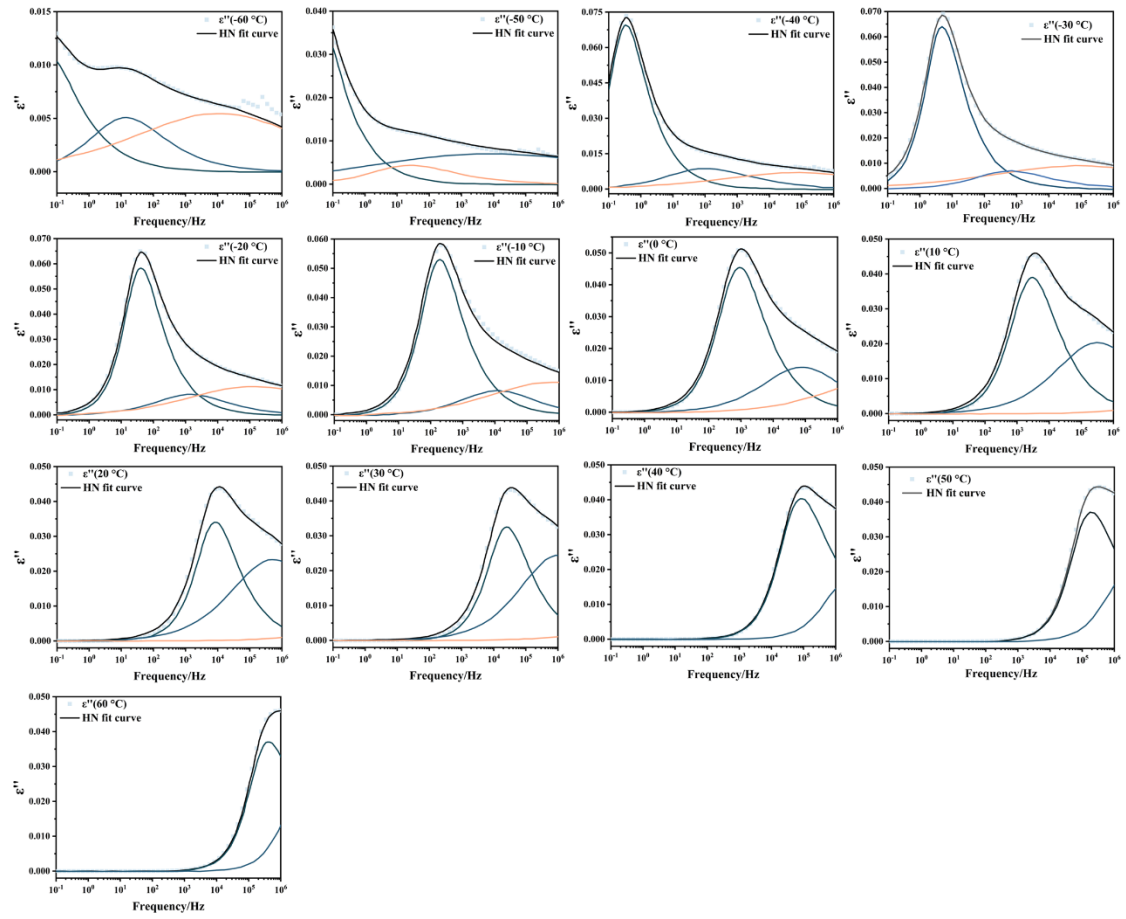

**Supplementary Figure 9.** Dielectric loss spectra of PDES-EAN-a fitted by a combination of three H-N equations from -60 to 60 °C.

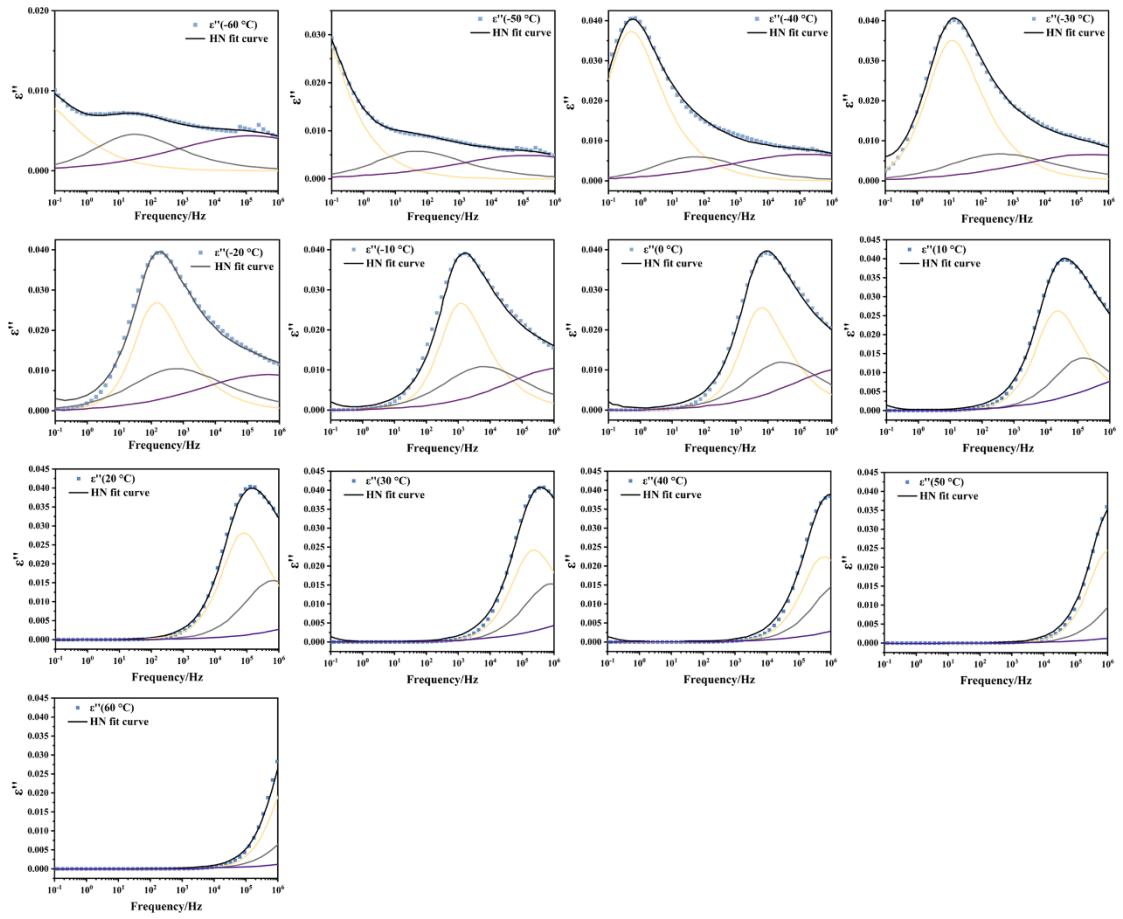

**Supplementary Figure 10.** Dielectric loss spectra of PDES-EAN-c fitted by a combination of three H-N equations from -60 to 60 °C.

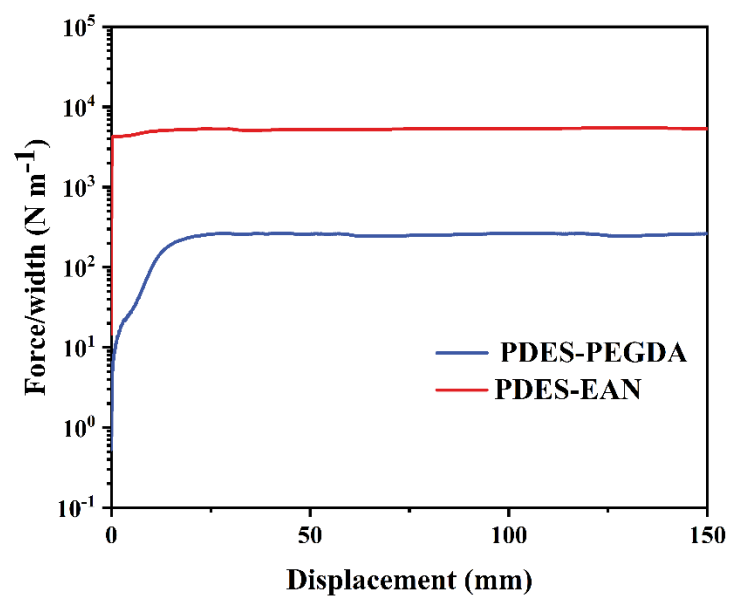

**Supplementary Figure 11.** 180 degree peeling curves of PDES-PEGDA and PDES-EAN-b.

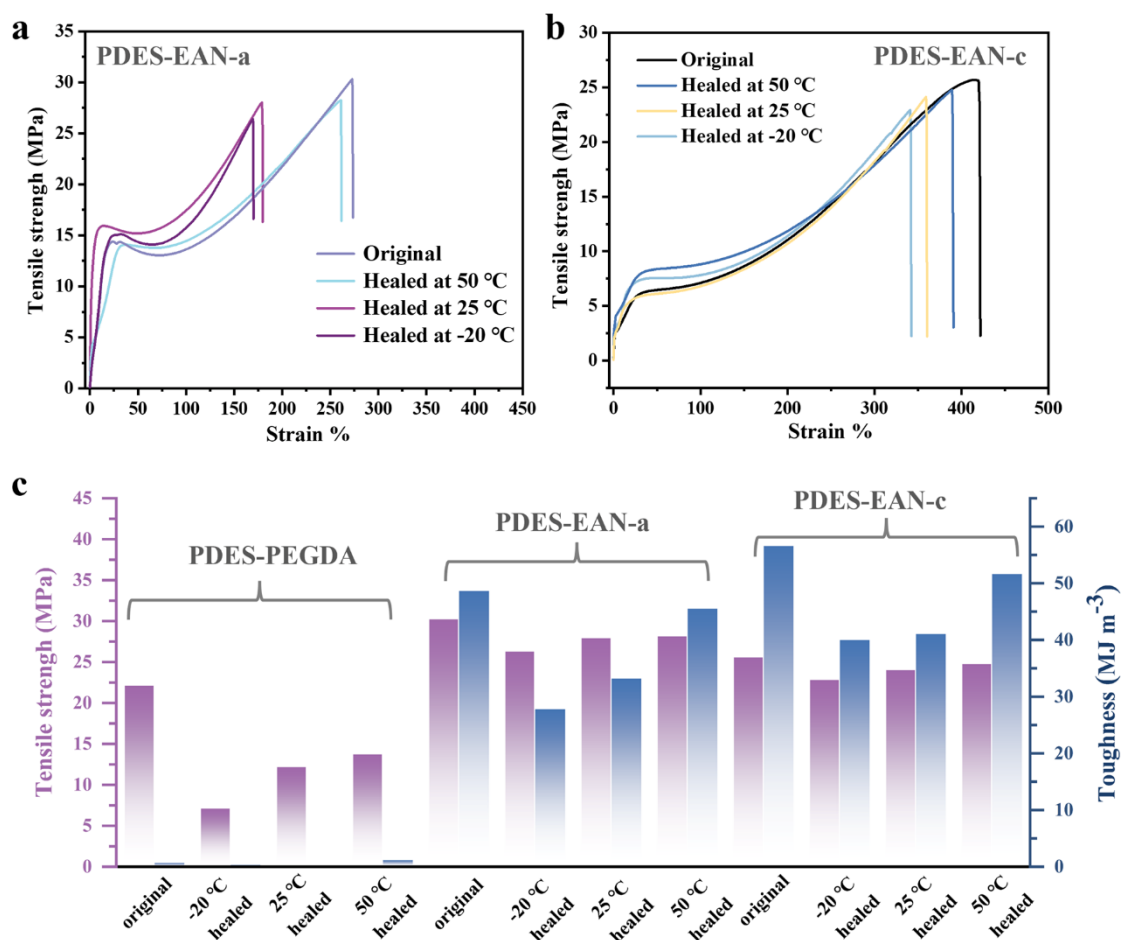

**Supplementary Figure 12.** Tensile curves of the original and self-healed samples for PDES-EAN-a (**a**) and PDES-EAN-c (**b**); Comparison of tensile strength and toughness of original and self-healed PDES-PEGDA, PDES-EAN-a, PDES-EAN-c samples (**c**).

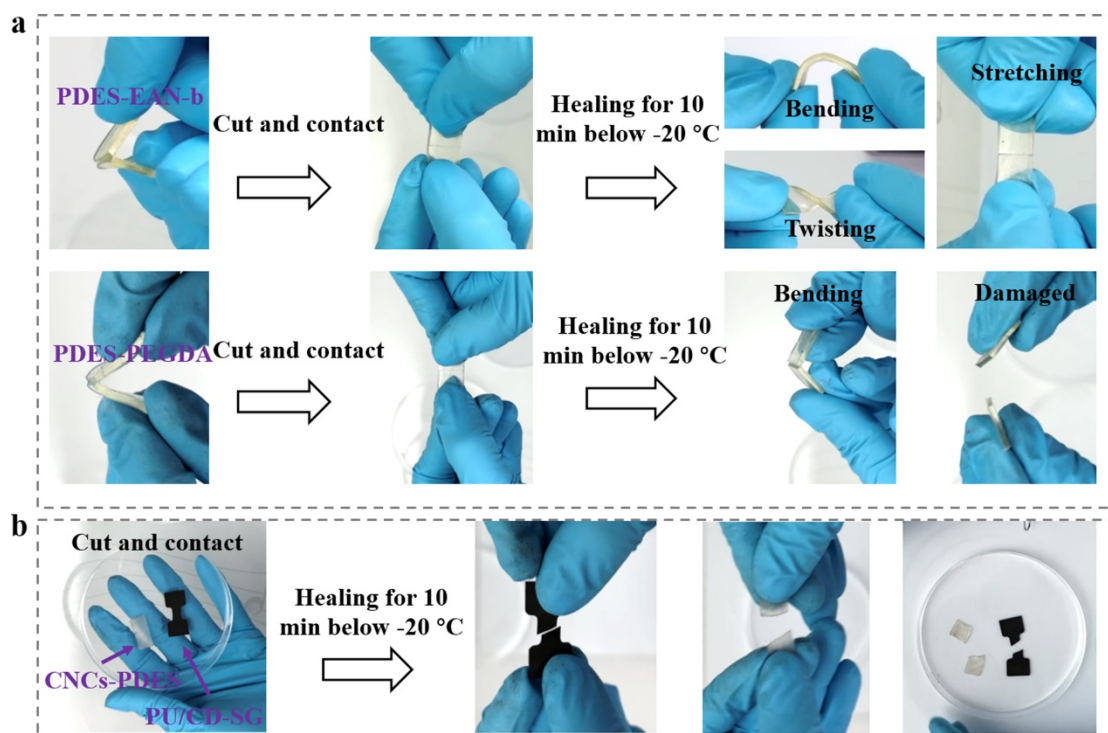

**Supplementary Figure 13.** Photographs demonstrating the subzero self-healing performance of PDES-EAN-b and PDES-PEGDA **(a)**, highly stretchable PDES (CNCs-PDES,  $T_g < -50$  °C) and polyurethane with multiple hydrogen bonds (PU/CD-SG,  $T_g \approx 4$  °C) **(b)**.

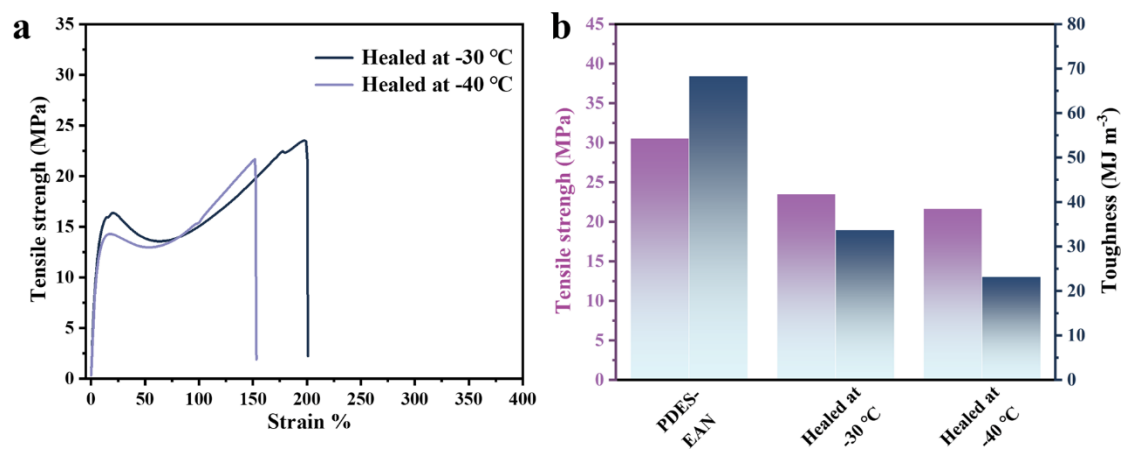

**Supplementary Figure 14.** Tensile curves of PDES-EAN-b samples after self-healing at -30 and -40 °C **(a)**; Comparison of tensile strength and toughness of original and self-healed PDES-EAN-b samples **(b)**.

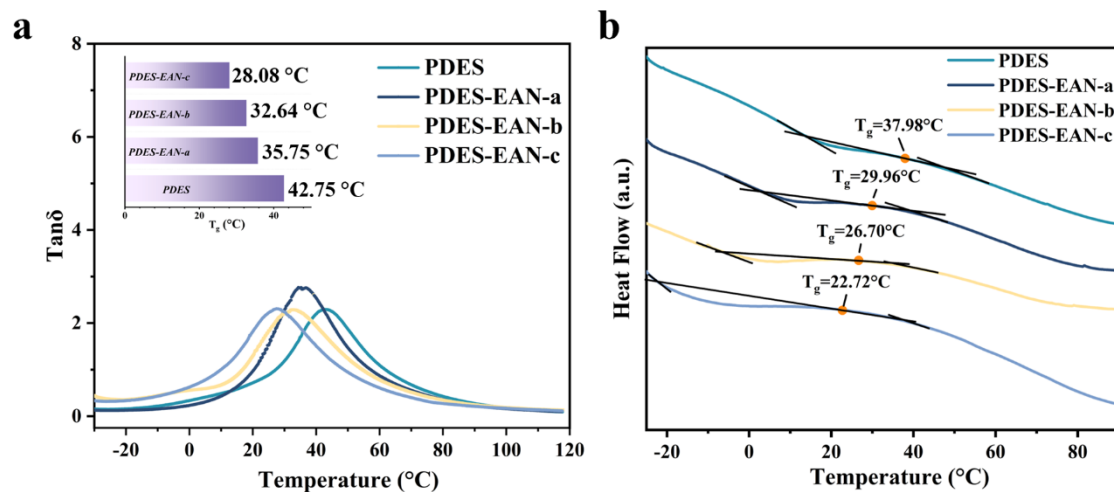

**Supplementary Figure 15.** The DMA (**a**) and DSC (**b**) curves of samples with multiple different EAN: PDES compositions.



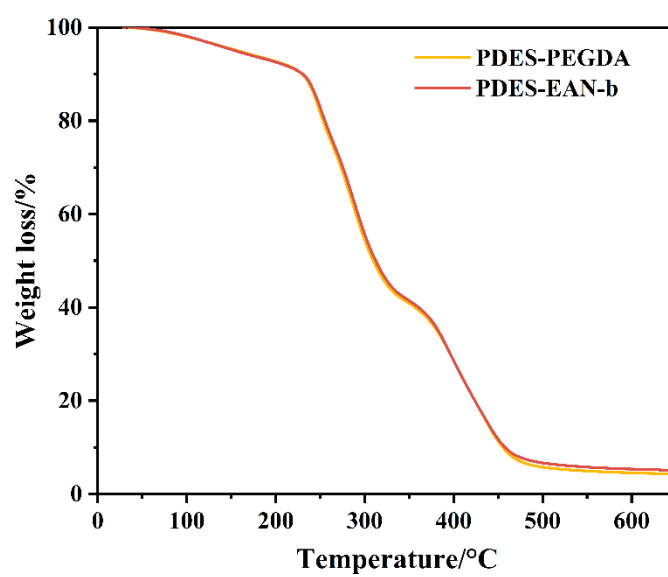

**Supplementary Figure 16.** TG curves of PDES-PEGDA and PDES-EAN samples upon heating from 30 °C to 650 °C at a rate of 10 °C /min.

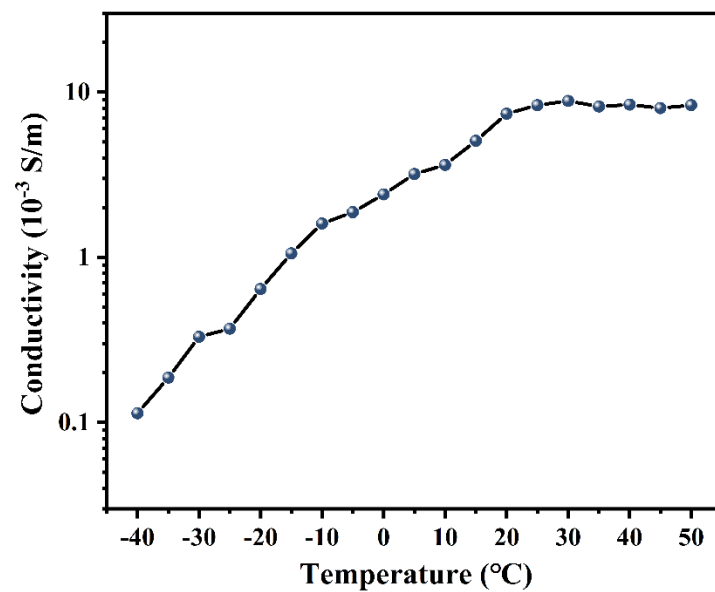

**Supplementary Figure 17.** The temperature-dependent conductivity curves of PDES-EAN-b.

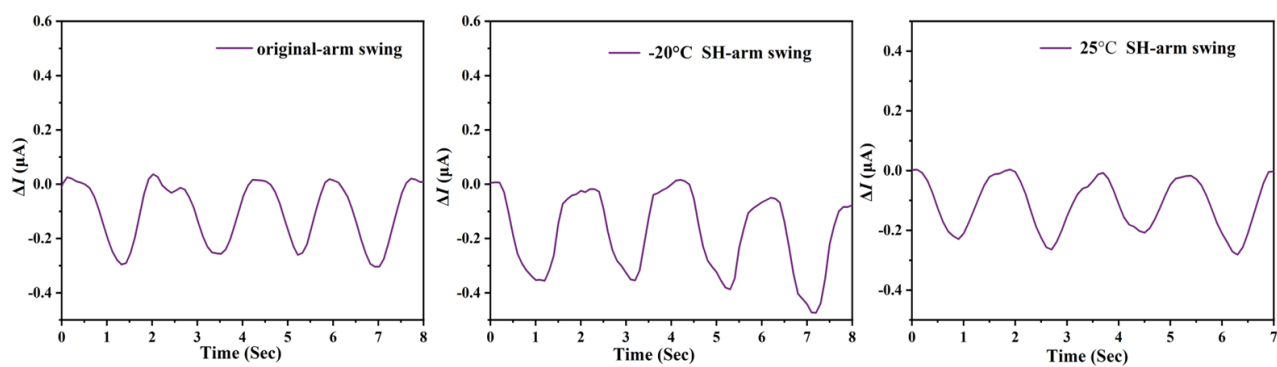

**Supplementary Figure 18.** Current responses of the original, -20 °C self-healed and 25 °C self-healed sensors in body movements.

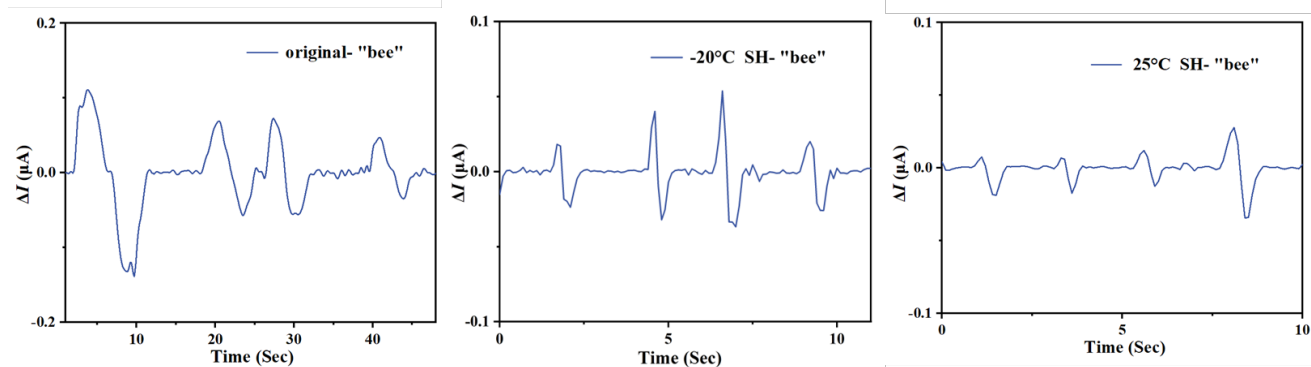

**Supplementary Figure 19.** Current responses of the original, -20 °C self-healed and 25 °C self-healed sensors in vocal-cord vibrations.

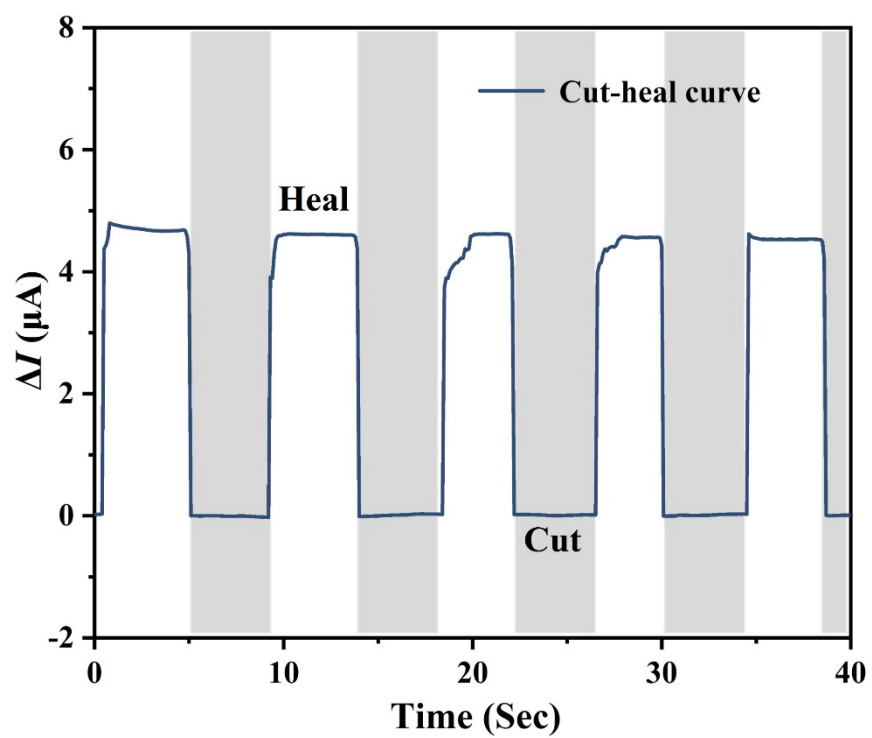

**Supplementary Figure 20.** Current responses in the cycle of cutting and healing.

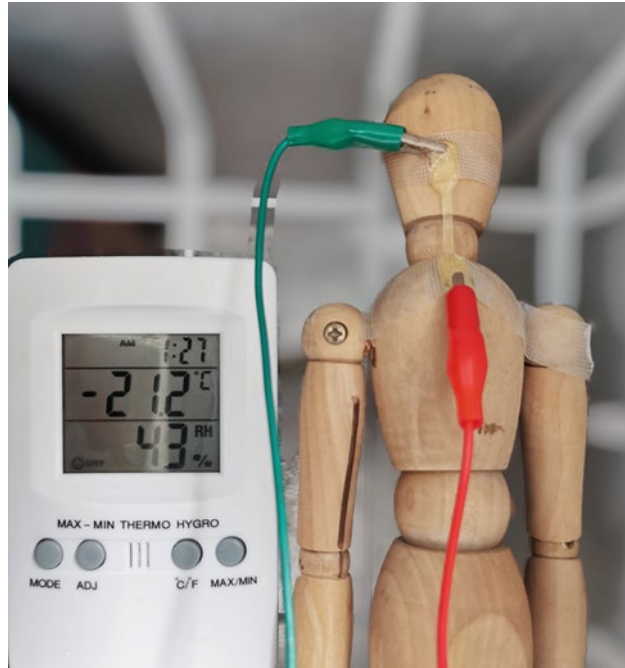

**Supplementary Figure 21.** The digital photograph of sensing ability test at subzero temperatures.

### Supplementary Table:

**Table 1. Comparison of ultimate tensile strength, self-healing abilities, and functional healing of various self-healing polymers <sup>a</sup>.**

| Ref.         | Self-healing motif                             | Ultimate tensile strength [MPa] | Minimum healing temperature | Self-healing below 0 °C | Best Self-healing efficiency [%] | Functional healing |
|--------------|------------------------------------------------|---------------------------------|-----------------------------|-------------------------|----------------------------------|--------------------|
| <sup>1</sup> | Dynamic covalent urea bonding                  | 7                               | 70                          | \                       | 90                               | \                  |
| <sup>2</sup> | Disulfides                                     | 5.3                             | 60                          | \                       | 43                               | \                  |
| <sup>3</sup> | Hydrogen bonding and electrostatic interaction | 0.9                             | 25                          | \                       | 20                               | yes                |
| <sup>4</sup> | Hydrogen bonding and borate ester bonding      | 0.2                             | 25                          | \                       | 99.6                             | yes                |
| <sup>5</sup> | Metal–ligand                                   | 16                              | 25                          | \                       | 99                               | \                  |

|           |                                   |      |     |     |      |     |
|-----------|-----------------------------------|------|-----|-----|------|-----|
| 6         | Hydrogen bonding                  | 18.5 | 25  | \   | 77.5 | \   |
| 7         | Hydrogen bonding                  | 12.9 | 25  | \   | 100  | \   |
| This work | Hydrogen bonding and metal–ligand | 30.9 | -20 | yes | 97.3 | yes |

<sup>a</sup> self-healing efficiency =  $\sigma_{\text{healing}}/\sigma_{\text{original}}$ .



## Supplementary References

1. Wang, Z. *et al.* Dynamic covalent urea bonds and their potential for development of self-healing polymer materials. *J. Mater. Chem. A* **7**, 15933–15943 (2019).
2. Chang, K., Jia, H. & Gu, S. Y. A transparent, highly stretchable, self-healing polyurethane based on disulfide bonds. *Eur. Polym. J.* **112**, 822–831 (2019).
3. Wu, X., Luo, R., Li, Z., Wang, J. & Yang, S. Readily self-healing polymers at subzero temperature enabled by dual cooperative crosslink strategy for smart paint. *Chem. Eng. J.* **398**, 125593 (2020).
4. Song, M. *et al.* Constructing stimuli-free self-healing, robust and ultrasensitive biocompatible hydrogel sensors with conductive cellulose nanocrystals. *Chem. Eng. J.* **398**, 125547 (2020).
5. Zhang, W., Wu, B., Sun, S. & Wu, P. Skin-like mechanoresponsive self-healing ionic elastomer from supramolecular zwitterionic network. *Nat. Commun.* **12**, (2021).
6. Wang, H. *et al.* Room-temperature autonomous self-healing glassy polymers with hyperbranched structure. *Proc. Natl. Acad. Sci. U. S. A.* **117**, (2020).
7. Xu, J. H., Chen, J. Y., Zhang, Y. N., Liu, T. & Fu, J. J. A Fast Room-Temperature Self-Healing Glassy Polyurethane. *Angew. Chemie - Int. Ed.* **60**, 7947–7955 (2021).
